# Supplementary material for: Novel Cytological Diagnostic Scoring System for Pancreatic Specimens Obtained by Endoscopic Ultrasound-Guided Fine Needle Aspiration
Source: Research Square preprint supplement (doi:10.21203/rs.3.rs-112496/v1), 2020-11-25
Supplement: Supplementary file 1 [file b6ba2126808476509bb61a59.docx]

**Novel Cytological Diagnostic Scoring System for Pancreatic Specimens Obtained by Endoscopic Ultrasound-Guided Fine Needle Aspiration**

Yuri Kiso, CT; Yoko Matsuda, MD, PhD; Shikine Esaka, CT; Yuri Hamashima, CT; Hiroto Shirahata, CT; Yuko Fujii, MD; Miho Matsukawa, MD; Mototsune Kakizaki, MD; Tatsuro Ishizaki, MD, PhD; and Tomio Arai, MD, PhD

Supplementary Table 1. Discrepancy between scoring and pathological diagnosis

|  | Case A | Case B | Case C |
| --- | --- | --- | --- |
| Pathological diagnosis | malignant | malignant | benign |
| Irregular structure | 1 | 1 | 1 |
| Hyperchromasia | 1 | 1 | 1 |
| Irregular cell polarity | 0 | 1 | 1 |
| Unclear cell boundary | 1 | 0 | 1 |
| Nuclear membrane thickening | 0 | 1 | 0 |
| Anisonucleosis | 0 | 1 | 0 |
| Overlapping | 1 | 1 | 0 |
| High N/C ratio | 0 | 1 | 1 |
| Irregular nuclei | 0 | 1 | 1 |
| Decreased cell adhesion | 0 | 0 | 1 |
| Two-cell pattern | 0 | 0 | 1 |
| Prominent nucleoli | 0 | 0 | 1 |
| Necrotic background | 0 | 0 | 0 |
| Score | 4 | 8 | 9 |
